# Supplementary material
Source: publisher figshare collection journal article supplement (https://gsajournals.figshare.com/ndownloader/files/20183141)
Supplement: Supplementary file 1 [file 20183141]

**Figure S8**

**
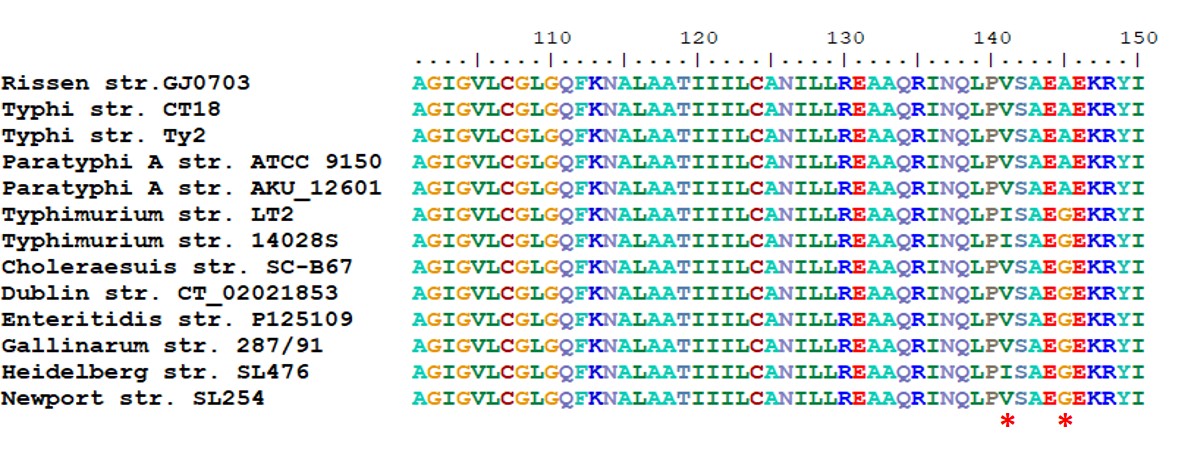
**

**Amino acid variation in MgtC.** Asterisks denote 141V and 145A in *S*. Rissen, S. Typhi and *S*. Paratyphi A. The amino acid alignment was performed with BioEdit 7.0.
